# Supplementary material for: Aerosols drive monsoon rainfall spatial modulations over the Indian subcontinent: anthropogenic and dust aerosols impact, mechanism, and control
Source: Copernicus journal article supplement (doi:10.5194/egusphere-2025-2302), 2025-06-06
Supplement: Supplementary file 1 [file egusphere-2025-2302-supplement.pdf]

# Supplementary Material for

## Aerosols drive monsoon rainfall spatial modulations over the Indian subcontinent: anthropogenic and dust aerosols impact, mechanism, and control

Sauvik Santra<sup>1</sup>, Shubha Verma<sup>1\*</sup>, Shubham Patel<sup>1</sup>, Olivier Boucher<sup>2</sup>, Mathew Koll Roxy<sup>3</sup>

<sup>1</sup>Department of Civil Engineering, Indian Institute of Technology Kharagpur, India

<sup>2</sup>Institut Pierre-Simon Laplace, Sorbonne Université / CNRS, Paris, France

<sup>3</sup>Centre for Climate Change Research, Indian Institute of Tropical Meteorology, Pune, India

\*Corresponding author: [shubha@iitkgp.ac.in](mailto:shubha@iitkgp.ac.in)

**This PDF includes:**

Figures S1, S2, S3

Tables S1, S2

Figure S1: Integrated Modelling Framework

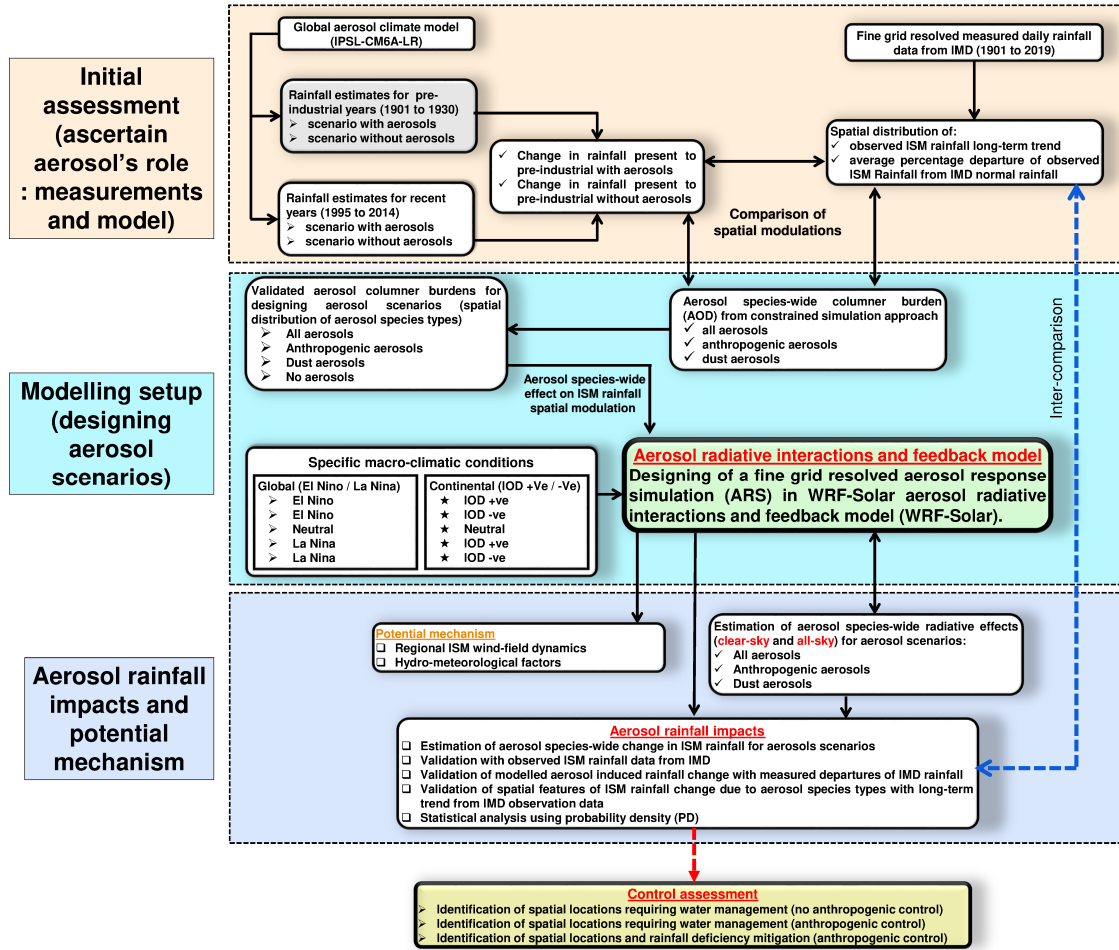

Flowchart of the methodology for assessing aerosol-induced changes in monsoon rainfall, mechanisms, and controls targeting anthropogenic aerosols.

# Table S1: Simulation Design

Designed simulations of rainfall for aerosol scenarios under five climatic conditions prevalent during ISM

| Simulation No. | Climatic Scenario |                | Year | Aerosol Type | Aerosol Season used | Met Season used |
|----------------|-------------------|----------------|------|--------------|---------------------|-----------------|
|                | Global            | Subcontinental |      |              |                     |                 |
| 1              | La Niña           | Positive IOD   | 2010 | All          |                     |                 |
| 2              |                   |                | 2010 | Anthro       |                     |                 |
| 3              |                   |                | 2010 | Dust         |                     |                 |
| 4              |                   |                | 2010 | None         |                     |                 |
| 5              |                   | Negative IOD   | 2011 | All          |                     |                 |
| 6              |                   |                | 2011 | Anthro       |                     |                 |
| 7              |                   |                | 2011 | Dust         |                     |                 |
| 8              |                   |                | 2011 | None         |                     |                 |

# Figure S2: Aerosol Optical Depth Components Monsoon (JJA) Monsoon (JJA)

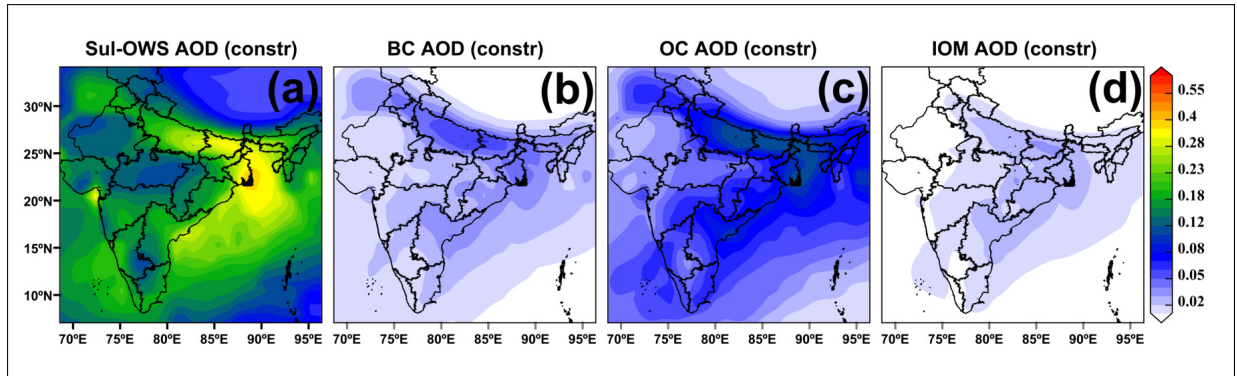

AOD due to (a) sulfate/other solubles, (b) black carbon, (c) organic carbon, (d) inorganic matter.

**Table S2: Rainfall Comparison (Model vs IMD)**

|              | Region 1      |              | Region 2        |                 |
|--------------|---------------|--------------|-----------------|-----------------|
|              | Dust Aerosols | All Aerosols | Anthro Aerosols | All Aerosols    |
| Model (ARS)  | 15 (29) [51]  | 9 (18) [46]  | -17 (-28) [-48] | -16 (-28) [-41] |
| IMD rainfall | 16 (21) [33]  |              | -21 (-29) [-36] |                 |

Comparison in mm of modelled vs observed rainfall modulation. Values are average (10th percentile) [max].

**Figure S3: Wind and Rainfall Change**

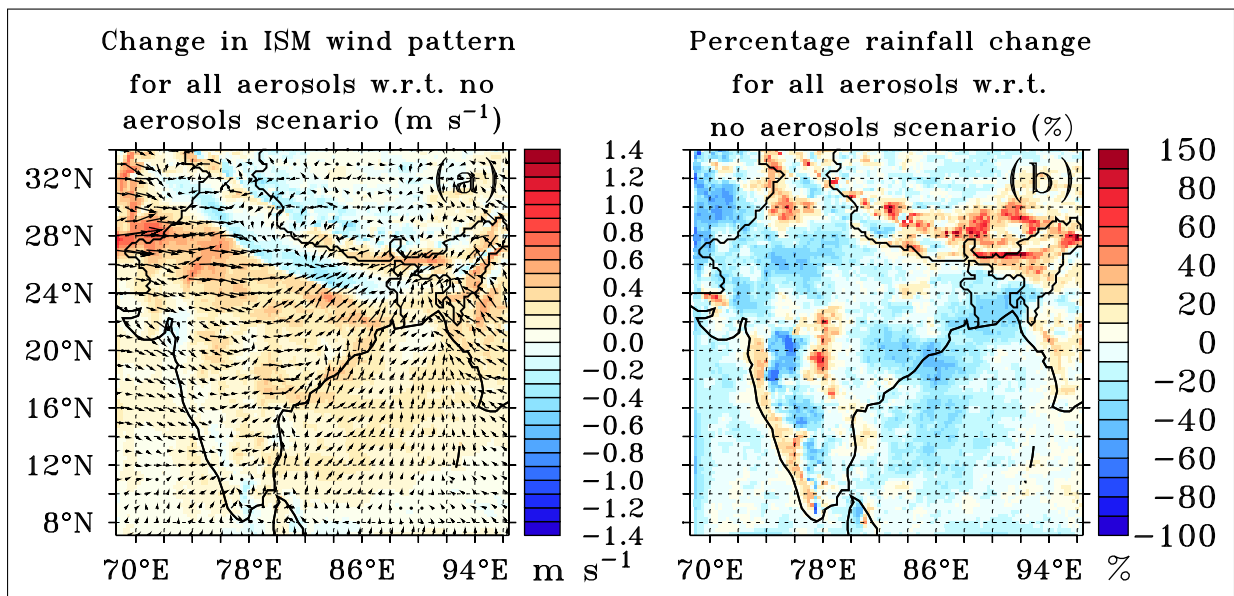

Spatial distribution of change in (a) wind fields and (b) ISM rainfall for all-aerosol vs no-aerosol scenario.
